# Supplementary material for: Structural Insights into Ca2+-Calmodulin Regulation of Plectin 1a-Integrin β4 Interaction in Hemidesmosomes
Source: PubMed Central journal article supplement — Structure. 2015 Mar 3;23(3):558–70. doi: 10.1016/j.str.2015.01.011 (PMC4353693; doi:10.1016/j.str.2015.01.011), 2015-03-03
Supplement: mmc1.pdf [file mmc1.pdf]

**Structure, Volume 23**

## **Supplemental Information**

**Structural Insights into Ca<sup>2+</sup>-Calmodulin**

**Regulation of Plectin 1a-Integrin  $\beta$ 4**

**Interaction in Hemidesmosomes**

**Jae-Geun Song, Julius Kostan, Friedel Drepper, Bettina Knapp,  
Euripedes de Almeida Ribeiro, Jr., Petr V. Konarev, Irina Grishkovskaya, Gerhard Wiche,  
Martin Gregor, Dmitri I. Svergun, Bettina Warscheid, and Kristina Djinović-Carugo**



## 25 **Supplementary Information**

### 26 **Materials and Methods**

#### 27 ***Protein Cloning, Expression and Purification***

28 The murine plectin construct (P1aABD, 1-263) contains the N-ter tail and the actin-binding domain (ABD)  
29 of plectin isoform 1a (Uniprot accession number: **Q9QXS1-3**). The truncation mutants of P1aABD were  
30 generated to express various lengths of the N-ter segment, and were named P1aABD $\Delta$ 11 (12-263),  
31 P1aABD $\Delta$ 22 (23-263), P1aABD $\Delta$ 32 (33-263), and P1aABD $\Delta$ 37 (38-263). The integrin  $\beta$ 4 construct termed  
32  $\beta$ 4Fn12 (1126-1355) comprises the first pair of fibronectin type III domains including a part of the  
33 connecting segment (CS) of integrin  $\beta$ 4 (Niessen et al., 1997) and was cloned using the cDNA of human  
34 integrin  $\beta$ 4 (Rezniczek et al., 1998). The full-length calmodulin construct (CaM, 1-148) and its truncated  
35 versions encoding the N-ter and C-terminal lobes (CaM<sub>NL</sub> (6-73) and CaM<sub>CL</sub> (83-148), respectively) were  
36 prepared by cloning the entire human CaM gene III (Uniprot accession number: **P62158**). To generate  
37 constructs for heterologous expression in *E. coli*, plectin, calmodulin, and integrin  $\beta$ 4 cDNAs were cloned  
38 into the pETM-14 vector, which encodes an N-ter His<sub>6</sub>-tag and the 3C protease cleavage site.

39 An expression plasmid CaM-YFP (pMG13) encoding C-terminally EYFP-tagged calmodulin was generated  
40 by subcloning cDNA for human CaM gene III (a gift from D.C. Chang, Hong Kong University, China) into  
41 pEGFP-N2 -based plasmid (Clontech Laboratories, Inc.), where enhanced GFP had been replaced by EYFP  
42 (pEYFP). For cloning P1aABD-CFP (pMG39) encoding C-terminally ECFP-tagged plectin 1aABD, cDNA  
43 encoding a plectin fragment corresponding to exons 1a-8 (1aABD) (Kostan et al., 2009) was subcloned  
44 into pECFP-N2 plasmid which was generated using the same cloning strategy as pEYFP (see above). The  
45 YFP- and CFP-encoding plasmids were kindly provided by R. Tsien (University of California, San Diego,  
46 USA). The expression plasmid encoding CFP-YFP fusion was gift from D. Stanek (Institute of Molecular  
47 Genetics, Academy of Sciences of the Czech Republic, Czech Republic).

48 Oligonucleotide primers were designed to mutate two hydrophobic residues (Leu25Asp and Val29Asp)  
49 in the N-ter tail of plectin 1a. The PCR was carried out using the pMG39 vector mentioned above and the  
50 mutagenesis oligonucleotide primers (LVDD-F: 5' AGCTCAGAGGACAACGACTACCTGGCTGACCTCAGA  
51 GCCTCCGAG and LVDD-R: 5' CTCGGAGGCTCTGAGGTCAGCCAGGTAGTCGTTGCTCTGAGCT). The  
52 amplified vector was incubated with *DpnI* at 37 °C for 1 h to digest the template plasmid, followed by  
53 the transformation of competent *E. coli* DH5 $\alpha$  cells.

54 The proteins were overexpressed in *E. coli* Rosetta2 (DE3) pLysS cells at 18 °C for 16 h after IPTG  
55 induction once the population reached an OD 600 of 0.6. Cells were lysed by sonication and protein  
56 purification was carried out using a 5 ml HisTrap HP column (GE Healthcare). To remove the His<sub>6</sub>-tag,  
57 proteins were dialyzed against buffer containing 20 mM Tris-HCl pH 7.5, 500 mM NaCl, 0.1 mM EDTA,  
58 and 2 mM β-mercaptoethanol, and incubated with GST-3C protease. After a second nickel-affinity  
59 chromatography step, used to remove uncleaved protein, cleaved protein was further purified by gel  
60 filtration using a Superdex 75 16/600 column (GE Healthcare) equilibrated with 20 mM Tris-HCl pH 7.5,  
61 150 mM NaCl, and 0.1 mM EDTA. To remove GST-3C protease from the sample, 5ml GStrap HP column  
62 (GE Healthcare) was connected in series with the gel filtration column.

63

#### 64 ***Small Angle X-ray Scattering (SAXS)***

65 SAXS experiments on the P1aABD/CaM complex were performed using the SAXS beamline X33 at DESY  
66 (Hamburg, Germany) (Blanchet et al., 2012). The protein complex was purified by size-exclusion  
67 chromatography using a Superdex 75 16/60 column (GE Healthcare) after mixing P1aABD and CaM in an  
68 equal molar ratio. Protein samples were prepared in three different concentrations (3.5, 6.0, and 8.4  
69 mg/ml) in the SAXS buffer (20 mM Tris-HCl pH 7.5, 150 mM NaCl, 5 mM CaCl<sub>2</sub>, and 1 mM DTT).  
70 Structural parameters, zero-angle intensity ( $I(0)$ ) and radius of gyration ( $R_g$ ), from the Guinier plot were  
71 calculated using PRIMUS (Konarev et al., 2003). The program GNOM was employed to generate the pair  
72 distribution curve for determining the maximum dimension ( $D_{max}$ ) and to obtain  $R_g$  and  $I(0)$  values  
73 (Svergun, 1992). *Ab initio* shape determination was computed by the program DAMMIF (Franke and  
74 Svergun, 2009) and generated dummy models were averaged using the program DAMAVER (Volkov and  
75 Svergun, 2003). Rigid-body modeling of the complex was performed by the program CORAL (Petoukhov  
76 et al., 2012) employing two subunits - one is the crystal structure of the P1aABD<sub>Δ22</sub>/CaM<sub>NL</sub> complex and  
77 the other is the crystal structure of CaM<sub>CL</sub> (83-148, PDB: 3CLN) (Babu et al., 1988), which was combined  
78 with an *ab initio* approach to model missing residues (1-21 residues of P1aABD and 74-82 residues of  
79 CaM).

80 SAXS data of the P1aABD/β4Fn12 complex were collected at SWING beamline in the synchrotron SOLEIL  
81 (Saint-Aubin, France) (David and Perez, 2009) and processed using the program Foxtrot. The protein  
82 complex was prepared by mixing P1aABD and β4Fn12 in an equal molar ratio with three concentration

83 series (2.4, 4.5, and 6.9 mg/ml) containing the SAXS buffer lacking CaCl<sub>2</sub>. *Ab initio* structure  
84 determination of the P1aABD/β4Fn12 complex was performed in the same way as for the P1aABD/CaM  
85 complex. The program OLIGOMER (Konarev et al., 2003) was employed to calculate the volume fraction  
86 of the P1aABD/β4Fn12 complex in solution to account for its partial dissociation for the concentrations  
87 used. The residues missing in the crystal structure of the P1aABD<sub>Δ22</sub>/β4Fn12 complex (1-37 residues of  
88 P1aABD and 1321-1355 residues of β4Fn12) were modeled by the program BUNCH (Petoukhov et al.,  
89 2012) before generating form factors for OLIGOMER analyses.

90 EOM (Ensemble optimization method) was employed to assess the flexibility of the N-ter tail of P1a  
91 (Bernado et al., 2007). Three concentrations of P1aABD samples (3.0, 4.5, and 6.0 mg/ml) were  
92 measured at the SAXS beamline X33 at the DORIS III storage ring, DESY (Hamburg, Germany) (Blanchet  
93 et al., 2012). The random pool of 10,000 conformers was generated to model the N-ter tail using the  
94 crystal structure of plectin ABD as a constraint. 50 models in the pool were selected to calculate the  
95 averaged scattering intensity (termed as selected ensemble), which was fitted to experimental data. Rg  
96 distributions against the frequency of occurrence were analyzed and compared between the pool and  
97 the selected ensemble.

98

### 99 ***Cross-Linking and Mass Spectrometry Analyses***

100 Cross-linking experiments were performed using both a one-step and a two-step protocol. For the one-  
101 step method, 2 mM 1-ethyl-3-(3-dimethylaminopropyl)carbodiimide (EDC) and 5 mM N-hydroxysulfo-  
102 succinimide (sulfo-NHS) were added to the mixture of P1aABD and CaM (5 μM each prepared in the  
103 reaction buffer I consisting of 0.1 M MES-NaOH pH 6.5, 0.5 M NaCl and 2 mM CaCl<sub>2</sub>) or to the mixture of  
104 P1aABD and β4Fn12 (5 μM each prepared in the reaction buffer II consisting of 20 mM HEPES pH 7.5, 50  
105 mM NaCl) and incubated for 30 min at RT. For the two-step cross-linking method, 5 μM CaM or 5 μM  
106 β4Fn12 were prepared in the reaction buffer I and II, respectively, and activated with 2 mM EDC and 5  
107 mM sulfo-NHS for 15 min at RT followed by the addition of 20 mM β-mercaptoethanol to quench  
108 excessive EDC. Subsequently, P1aABD prepared in the respective reaction buffer was added to the  
109 activated protein (CaM or β4Fn12) in equal molar ratio and incubated for 30 min at RT.

110 Following separation of cross-linking samples by SDS-PAGE and staining of proteins with colloidal  
111 Coomassie Blue G-250, protein bands were excised, subjected to in-gel digestion using trypsin and

112 analyzed by nano-HPLC-ESI-MS/MS using an UltiMate 3000 RSLCnano/LTQ-Orbitrap XL system (Thermo  
113 Fisher Scientific, Bremen, Germany) as described (Cristodero et al., 2013). In a first step, data files from  
114 LC-MS/MS measurements were analyzed by standard database searches using the programs OMSSA  
115 (version 2.1.9) (Geer et al., 2004) and MaxQuant (version 1.3.0.5) (Cox et al., 2011). All searches were  
116 done against the amino acid sequences for the recombinant proteins and for a set of common  
117 contaminants as provided with the distribution of the MaxQuant program with tryptic specificity  
118 allowing up to two missed cleavages. Oxidation of methionine and carbamidomethylation of cysteine  
119 residues were considered as variable and fixed modification, respectively. The mass tolerance for  
120 precursor ions was set to 5 ppm and for fragment ions to 0.5 Da. Match between runs was applied with  
121 a tolerance in retention time of 2 min. In a second step, data were subjected to a stringent search for  
122 the identification of cross-linked peptides using in-house developed programs. For this purpose,  
123 theoretical tryptic peptides of the recombinant proteins were computed with accurate masses and  
124 stored as an indexed table in a MySQL database. For each theoretical peptide, the difference between  
125 its accurate mass and the precursor mass of each MS/MS spectrum was computed and queried against  
126 the list of peptides indexed by mass using the same mass tolerances as in the first search. The cross-  
127 linker specificity was taken into account by retrieving only peptide pairs containing at least one suitable  
128 residue on each peptide.

129 For those peptide pairs matching an accurate precursor mass, the list of theoretical fragment ions was  
130 generated and compared to the experimental list of fragment ions. P-values were assigned using the  
131 formula used for the Andromeda score (Cox et al., 2011) with minor changes as specified in the  
132 following. Neutral losses were considered for the precursor mass but not for fragment masses. Charges  
133 of fragment ions were allowed from +1 up to the charge of the precursor minus 1, but only if the charge  
134 state was within a tolerance of +/- 1 of the expected charge state based on the number of charged  
135 groups in the respective fragment. The expected charge state of fragment ions was computed as the  
136 number of basic sites estimated according to a simple scheme (Arg, Lys, N-term: 1; His: 0.5) (Schlosser et  
137 al., 2007).  $P_{\alpha/\beta}$ -values were determined analogously to the calculation of the overall P-value of a cross-  
138 linked peptide spectrum match. These values represent the probability of finding at least the number of  
139 matched out of the number of theoretical fragment masses by chance for the  $\alpha$ -/ $\beta$ -peptide of the cross-  
140 linked pair carrying the mass of the complementary peptide at one linkage residue. From the resulting

141 list of candidate peptide pairs, only those with  $P_{\alpha/\beta}$ -values below 0.05 were considered as cross-linked  
142 peptide spectrum matches.

143 Quantitative analysis of peptide spectrum matches was performed based on the intensities of peptide  
144 features in the allPeptides.txt result file from the MaxQuant program. For this purpose, the text file was  
145 stored in a MySQL table. For each peptide spectrum match, the sum of intensities was retrieved for  
146 features within the given precursor  $m/z$ -tolerance and  $\pm 1$  min around the retention time at which the  
147 MS/MS spectrum was recorded.

148

### 149 ***Förster Resonance Energy Transfer (FRET) Experiments***

150 Rat bladder carcinoma 804G cells were grown in Dulbecco's Modified Eagle's Medium (DMEM; Sigma  
151 Aldrich) medium, supplemented with 10% heat-inactivated fetal bovine serum and 1%  
152 penicillin/streptomycin (both PAA Laboratories). Cells were cultured at 37°C in 5% CO<sub>2</sub> and passaged  
153 every third day. Transient transfections of 804G cells were carried out in serum-free media using X-  
154 tremeGENE HP (Roche) according to the manufacturer's instructions with 2 µg plasmid and a 1:3 (w/v)  
155 ratio of DNA to transfection reagent. Cells were incubated with the transfection complexes for 24 hours  
156 and fixed in 4% paraformaldehyde/PIPES (Sigma Aldrich) for additional 24 h. After rinsing with Mg-PBS  
157 (phosphate-buffered saline supplemented with 10 mM Mg<sup>2+</sup>) and water, cells were embedded in  
158 glycerol containing 1,4-diazabicyclo[2.2.2]octane (DABCO). FRET was measured by the acceptor  
159 photobleaching method as previously described (Stanek and Neugebauer, 2004) using the Leica SP5  
160 confocal microscope. Intensities of CFP (excited by 405 nm laser set to 5–10% of maximum power) and  
161 YFP (excited by 514 nm laser line set to 2% of maximum power) were measured. Following this, YFP was  
162 bleached in a region of interest by three to five intensive (30% maximum power) pulses of 514 nm laser  
163 line and CFP and YFP fluorescence measured again. Apparent FRET efficiency was calculated according  
164 to the equation:

$$165 \text{ FRET}_{\text{efficiency}} (\%) = (\text{CFP}_{\text{after}} - \text{CFP}_{\text{before}}) \times 100 / \text{CFP}_{\text{after}}$$

166 Unbleached regions of the same cell were used as a negative control. Only cells displaying similar YFP  
167 and CFP signals were measured and cells not matching this criterion were omitted from the analysis.  
168 FRET efficiency is given throughout the text as mean  $\pm$  SEM.

169 **Supplementary Tables**170 **Supplementary Table 1. (Supporting Figure 2)**171 **Zero-length cross-link sites identified for complexes of P1aABD with CaM or integrin  $\beta 4$** 

| Mass / Da | Peptide of P1aABD     |      |                      | Construct      | Cross-linked peptide          |      |                      | P-value <sup>c</sup> | No. of spectra <sup>d</sup> | Sum of Intensity |
|-----------|-----------------------|------|----------------------|----------------|-------------------------------|------|----------------------|----------------------|-----------------------------|------------------|
|           | Sequence <sup>a</sup> | Site | P-value <sup>b</sup> |                | Sequence <sup>a</sup>         | Site | P-value <sup>b</sup> |                      |                             |                  |
| 1955.9565 | ASEGKKDE<br>R         | K36  | 6.7E-03              | CaM            | EAFSLFDK                      | E15  | 8.4E-14              | 4.7E-15              | 2                           | 8.4 E6           |
| 2372.1453 | KDER                  | K37  | 1.3E-03              | CaM            | EAFSLFDK<br>GDGTITTK          | E15  | 7.9E-11              | 8.4E-14              | 1                           | 2.1E6            |
| 2643.2760 | KDERDR                | K37  | 1.6E-03              | CaM            | EAFSLFDK<br>GDGTITTK          | E15  | 7.4E-08              | 5.2E-12              | 3                           | 8.4E6            |
| 1555.7858 | ASEGKK                | K36  | 1.9E-03              | CaM            | EAFSLFDK                      | E15  | 1.9E-07              | 2.0E-11              | 1                           | 3.0E6            |
| 2844.3763 | ASEGKKDE<br>R         | K36  | 2.8E-02              | CaM            | EAFSLFDK<br>GDGTITTK          | E15  | 7.7E-16              | 1.5E-17              | 2                           | 7.8E7            |
| 1818.8752 | EKGR                  | K92  | 2.1E-02              | CaM            | LTDEEVDE<br>MIR               | E121 | 3.2E-12              | 7.2E-14              | 1                           | 2.3E6            |
| 1818.8766 | EKGR                  | K92  | 1.5E-02              | CaM            | LTDEEVDE<br>MIR               | E124 | 1.0E-09              | 1.3E-11              | 1                           | 1.8E6            |
| 2211.1308 | HLIQAQR               | K58  | 1.1E-04              | CaM            | LTDEEVDE<br>M <sup>*</sup> IR | E124 | 2.8E-05              | 2.9E-10              | 2                           | 6.6E6            |
| 1320.6529 | KDERDR                | K37  | 1.0E-03              | CaM            | EAFR                          | E88  | 3.7E-02              | 2.5E-06              | 1                           | 1.5E5            |
| 1049.5253 | KDER                  | K37  | 2.5E-02              | CaM            | EAFR                          | E88  | 3.0E-03              | 2.4E-05              | 1                           | 8.3E4            |
| 1521.7516 | ASEGKKDE<br>R         | K36  | 1.3E-04              | CaM            | EAFR                          | E88  | 1.9E-02              | 5.8E-06              | 2                           | 1.9E6            |
| 1513.7656 | EKGR                  | K92  | 2.1E-02              | CaM            | HVM <sup>*</sup> TNLG<br>EK   | E115 | 3.5E-03              | 6.0E-05              | 2                           | 1.1E6            |
| 1815.9627 | KDERDR                | K37  | 1.9E-03              | $\beta 4$ Fn12 | M <sup>*</sup> LLIENLR        | E161 | 3.0E-09              | 2.5E-12              | 2                           | 9.1E6            |
| 1544.8339 | KDER                  | K37  | 5.9E-04              | $\beta 4$ Fn12 | M <sup>*</sup> LLIENLR        | E161 | 4.0E-08              | 3.6E-11              | 4                           | 9.3E6            |
| 1616.8907 | ASEGKK                | K36  | 2.2E-04              | $\beta 4$ Fn12 | M <sup>*</sup> LLIENLR        | E161 | 5.4E-07              | 1.3E-11              | 2                           | 1.0E7            |
| 2001.0679 | ASEGKKDE<br>R         | K36  | 1.3E-04              | $\beta 4$ Fn12 | MLLIENLR                      | E161 | 5.4E-07              | 5.0E-11              | 4                           | 4.1E7            |

<sup>a)</sup> E, K signify site of cross-linker, M<sup>\*</sup>, oxidized methionine

<sup>b)</sup> Subscores per peptide

<sup>c)</sup> P-value for cross-linked peptide

<sup>d)</sup> MS/MS spectra for ion species differing in charge or oxidation state; mass and P-values represent best match

172

173



174

**Supplementary Table 2. (Supporting Figures 3-5)**

175

**SAXS Data-collection and structural parameters**

| Sample                                  | P1aABD/CaM complex       | P1aABD/ $\beta$ 4Fn12 complex            | P1aABD                   |
|-----------------------------------------|--------------------------|------------------------------------------|--------------------------|
| <b>Data collection parameters</b>       |                          |                                          |                          |
| Instrument                              | SAXS beamline X33 (DESY) | SWING beamline at the synchrotron SOLEIL | SAXS beamline X33 (DESY) |
| Sample to detector distance (m)         | 2.7 m                    | 1.8 m                                    | 2.7 m                    |
| Wavelength ( $\text{\AA}$ )             | 1.5                      | 1.03                                     | 1.5                      |
| $S$ range ( $\text{\AA}^{-1}$ )         | 0.08-0.6                 | 0.04-0.38                                | 0.08-0.6                 |
| Exposure time (sec)                     | 15                       | 500                                      | 15                       |
| Temperature (K)                         | 283                      | 283                                      | 283                      |
| <b>Structural parameters</b>            |                          |                                          |                          |
| $I(0)$ [from $P(r)$ ]                   | $47.44 \pm 0.01$         | $0.0429 \pm 0.0001$                      | $26.05 \pm 0.01$         |
| $R_g$ (nm) [from $P(r)$ ]               | $3.17 \pm 0.01$          | $2.90 \pm 0.01$                          | $2.51 \pm 0.01$          |
| $I(0)$ (from Guinier)                   | $47.94 \pm 0.11$         | $0.0430 \pm 0.0057$                      | $26.29 \pm 0.04$         |
| $R_g$ (nm) (from Guinier)               | $3.17 \pm 0.01$          | $2.85 \pm 0.6$                           | $2.52 \pm 0.01$          |
| $D_{\max}$ (nm)                         | 10.5                     | 9.0                                      | 8.8                      |
| Porod volume estimate ( $\text{nm}^3$ ) | 79.33                    | 55.01                                    | 60.91                    |

176 Data are expressed as mean values  $\pm$  standard deviation.

177

178  
179  
180  
181  
182  
183  
184

**Supplementary Table 3. (Supporting Results section “Calmodulin Binds to Plectin 1a in an Extended Conformation)**

**Results of the PBD search for complexes where Ca<sup>2+</sup>-CaM binds to the interaction partner in an extended conformation.**

| <b>PDB</b> | <b>Year of deposition</b> | <b>Name</b>                                                                                                 | <b>CaM conformation</b> | <b>Binding via</b> |
|------------|---------------------------|-------------------------------------------------------------------------------------------------------------|-------------------------|--------------------|
| 4R8G       | 2014                      | Crystal Structure of Myosin-1c tail in complex with Calmodulin                                              | Extended                | C-lobe             |
| 4BYF       | 2014                      | Crystal structure of human Myosin 1c in complex with calmodulin in the pre-power stroke state               | Extended                | C-lobe             |
| 2MGU       | 2014                      | Structure of the complex between calmodulin and the binding domain of HIV-1 matrix protein                  | Extended                | Both lobes         |
| 4L79       | 2014                      | Crystal Structure of nucleotide-free Myosin 1b residues 1-728 with bound Calmodulin                         | Extended                | C-lobe             |
| 4DCK       | 2012                      | Crystal structure of the C-terminus of voltage-gated sodium channel in complex with FGF13 and CaM           | Extended                | C-lobe             |
| 3SJQ       | 2012                      | Crystal structure of a small conductance potassium channel splice variant complexed with calcium-calmodulin | Extended                | Both lobes         |

185  
186  
187

188 **Supplementary Table 4. (Supporting Results section “Molecular Determinants of Integrin  $\beta 4$**   
 189 **Displacement from the Complex with Plectin 1a by Calmodulin)**  
 190 **PISA binding interface analyses (Krissinel and Henrick, 2007)**

|                                                | P1aABD $\Delta$ 22/CaM <sub>NL</sub> |                   | P1aABD $\Delta$ 22/CaM <sub>CL</sub> |                   | P1aABD $\Delta$ 22/ $\beta$ 4Fn12 |                 |
|------------------------------------------------|--------------------------------------|-------------------|--------------------------------------|-------------------|-----------------------------------|-----------------|
|                                                | P1aABD $\Delta$ 22                   | CaM <sub>NL</sub> | P1aABD $\Delta$ 22                   | CaM <sub>CL</sub> | P1aABD $\Delta$ 22                | $\beta$ 4Fn12   |
| <b>Number of atoms</b>                         | 56<br>(2.8 %)                        | 61<br>(12.3 %)    | 57<br>(2.9 %)                        | 70<br>(13.3 %)    | 82<br>(4.4 %)                     | 75<br>(5.0 %)   |
| <b>Number of residues</b>                      | 15<br>(6.2 %)                        | 19<br>(29.2 %)    | 15<br>(6.2%)                         | 23<br>(35.4 %)    | 21<br>(9.3 %)                     | 24<br>(12.4 %)  |
| <b>Solvent-accessible area (Å<sup>2</sup>)</b> | 665<br>(5.2 %)                       | 635<br>(14.9 %)   | 671<br>(5.3%)                        | 617<br>(13.4 %)   | 700<br>(5.9 %)                    | 700<br>(6.3 %)  |
| <b>Solvation energy gain (kcal/mol)</b>        | -6.2<br>(2.9 %)                      | -6.7<br>(14.7 %)  | -5.2<br>(2.4 %)                      | -5.4<br>(11.2 %)  | 0.7<br>(-0.4 %)                   | -0.1<br>(0.1 %) |
| <b>P-value</b>                                 | 0.006                                | 0.140             | 0.021                                | 0.075             | 0.527                             | 0.591           |

191

192

193 **Supplementary Figures**

194

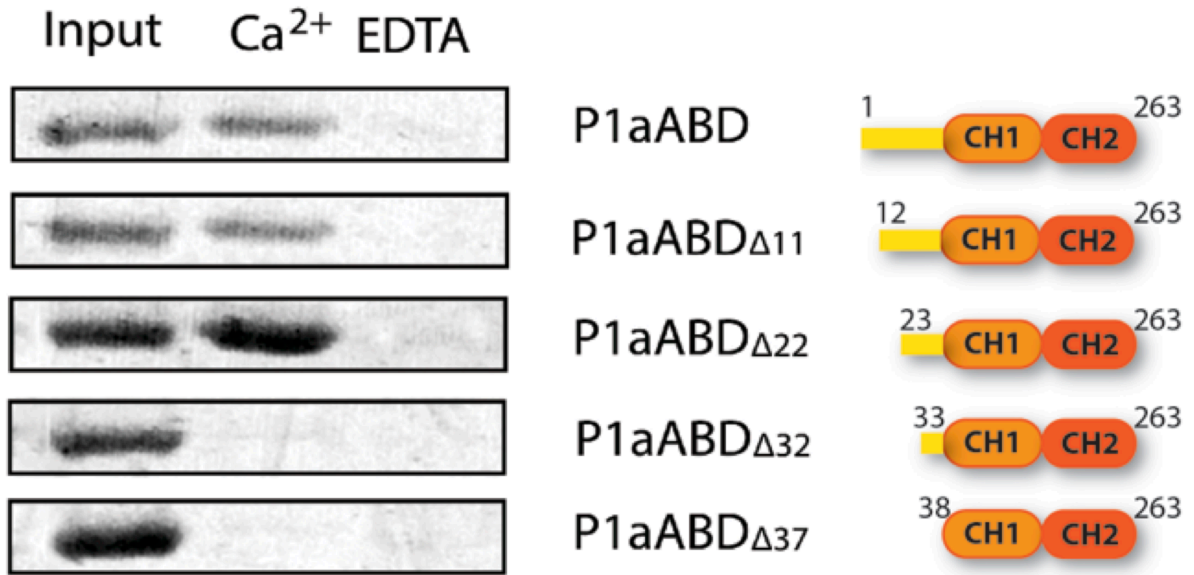

195

196 ***Supplementary Figure 1. (Supporting Results section “Plectin 1a Interacts with the N-ter Lobe***  
197 ***of Calmodulin”)***

198 Pull-down assay was carried out using CaM-Sepharose beads in the presence of either calcium  
199 or EDTA. P1aABD<sub>Δ22</sub>, the shortest plectin fragment displaying Ca<sup>2+</sup>-dependent binding to CaM-  
200 Sepharose, was selected for the crystallization trials. Schematic representations show  
201 fragments used in the assay.

202



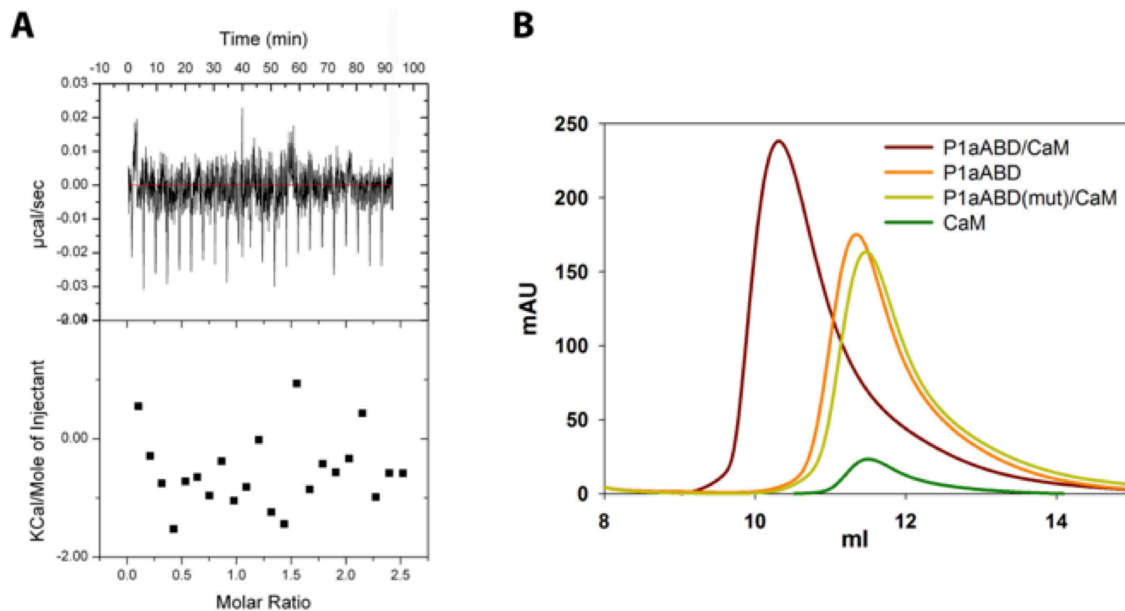

215

216 **Supplementary Figure 3. (Supporting Results section “Crystal Structure of the Plectin 1a ABD**  
 217 **in Complex with Calmodulin N-ter Lobe” and Figure 2)**

218 *In vitro* mutational analyses. **(A)** ITC experiment was carried out to measure the mutational  
 219 effect on the interaction. CaM is titrated to the P1aABD mutant (Leu25Asp and Val29Asp); no  
 220 interaction is observed. **(B)** Gel-filtration analyses. When P1aABD is mixed with CaM, it is eluted  
 221 earlier than CaM and P1aABD, suggesting the complex formation in solution. However P1aABD  
 222 mutant is not able to associate with CaM.

223

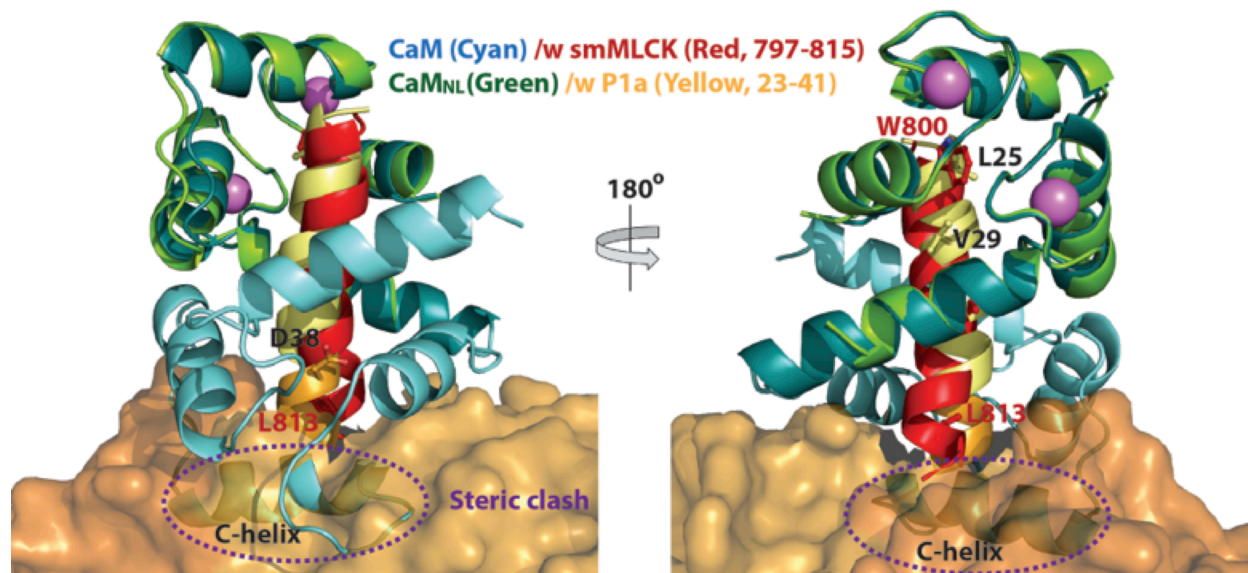

224

225 **Supplementary Figure 4. (Supporting Results section “Calmodulin Binds to Plectin 1a in an**  
 226 **Extended Conformation” and Figure 4)**

227 The crystal structure of the P1aABD<sub>Δ22</sub>/CaM<sub>NL</sub> complex superimposed on the crystal structure of  
 228 the CaM/smMLCK complex (PDB:1CDL) (RMSD: 0.684Å over 57 Cα); N and C-lobes are  
 229 respectively displayed in light and dark cyan and smMLCK peptide (797-815 residues) is shown  
 230 in red. The superposition shows that C-helix of N-lobe makes a steric clash with plectin ABD  
 231 (shown in a bronze (CH1) and orange (CH2) molecular surface).

232

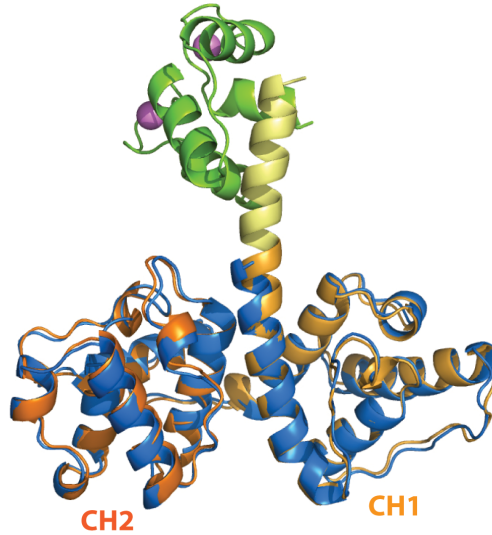

233

234 ***Supplementary Figure 5. (Supporting Results section “Plectin 1a N-terminal Tail Folds upon***  
235 ***Binding to Calmodulin” and Figure 4)***

236 The crystal structure of P1aABD<sub>Δ22</sub> is shown in blue and superimposed to the P1aABD<sub>Δ22</sub>/CaM<sub>NL</sub>  
237 complex (RMSD: 0.69 Å over 209 equivalent Cα atoms), demonstrating that the Ca<sup>2+</sup>/CaM  
238 binding does not affect the conformation of plectin ABD.

239



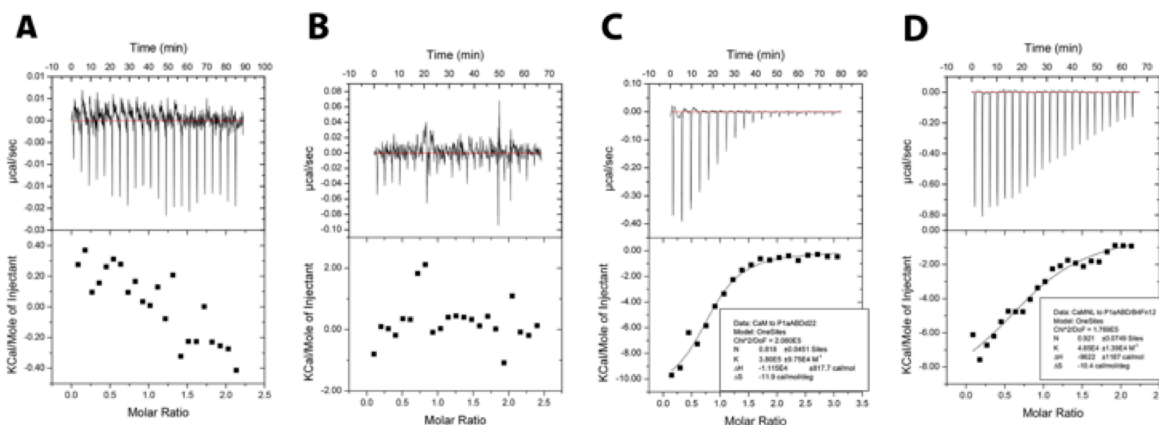

240

241 **Supplementary Figure 6. (Supporting Results section “N-terminal Tail of Plectin 1a is not**

242 **Involved in Interaction with Integrin β4” and Figure 7)**

243 ITC analyses **(A)** β4Fn12 (0.04 mM) was titrated with peptide comprising the first 60 N-terminal

244 residues of P1a (0.4 mM) at 30°C, displaying the no interaction. **(B)** β4Fn12 (0.04 mM) was

245 titrated with CaM (0.4 mM) at 30°C, displaying the no interaction. **(C)** P1aABD<sub>Δ22</sub> (0.02mM) was

246 titrated with CaM (0.3 mM); ITC experiment was carried out at 25 °C. The binding affinity of

247 P1aABD<sub>Δ22</sub> to CaM ( $K_d$ :  $2.6 \pm 1.0 \mu\text{M}$ ) is similar to that of P1aABD. **(D)** P1aABD/β4Fn12 complex

248 (0.07 mM) was titrated with CaM<sub>NL</sub> (0.7 mM); ITC experiment was carried out at 30 °C. CaM<sub>NL</sub>

249 bound to P1aABD in the presence of β4Fn12 with lower affinity ( $K_d$ :  $21.5 \pm 7.2 \mu\text{M}$ ).

250

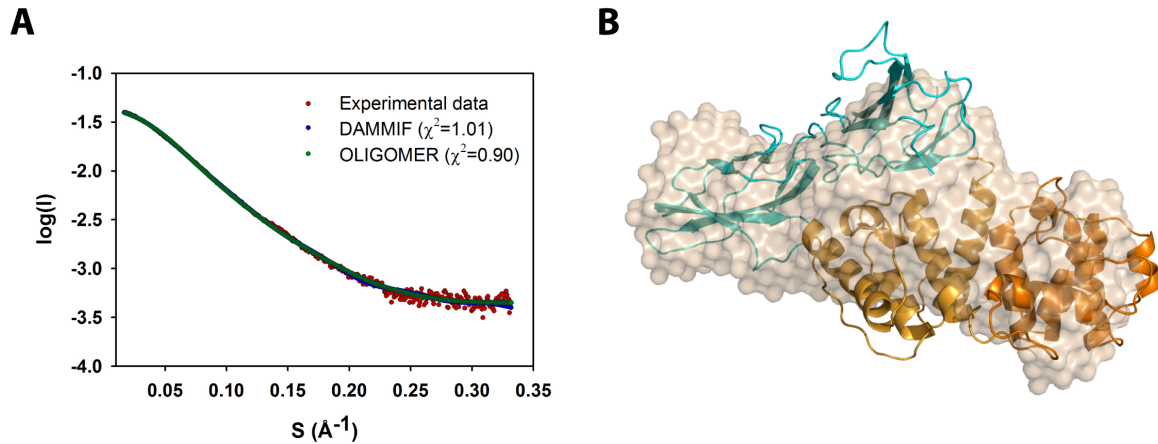

251

252 **Supplementary Figure 7. (Supporting Results section “N-terminal Tail of Plectin 1a is not**  
 253 **Involved in Interaction with Integrin β4” and Figure 6)**

254 **(A)** SAXS curves. The experimental scattering curve of the P1ABD/β4Fn12 complex is shown in  
 255 red. An *ab initio* model was fitted to experimental data and is shown in blue. The scattering  
 256 profile of the crystal structure of the P1aABD $_{\Delta 22}$ /β4Fn12 complex supplemented with missing  
 257 residues was calculated using OLIGOMER and is displayed in green. **(B)** The crystal structure of  
 258 the P1aABD $_{\Delta 22}$ /β4Fn12 complex superimposed on the *ab initio* shell reconstructed from SAXS  
 259 data .

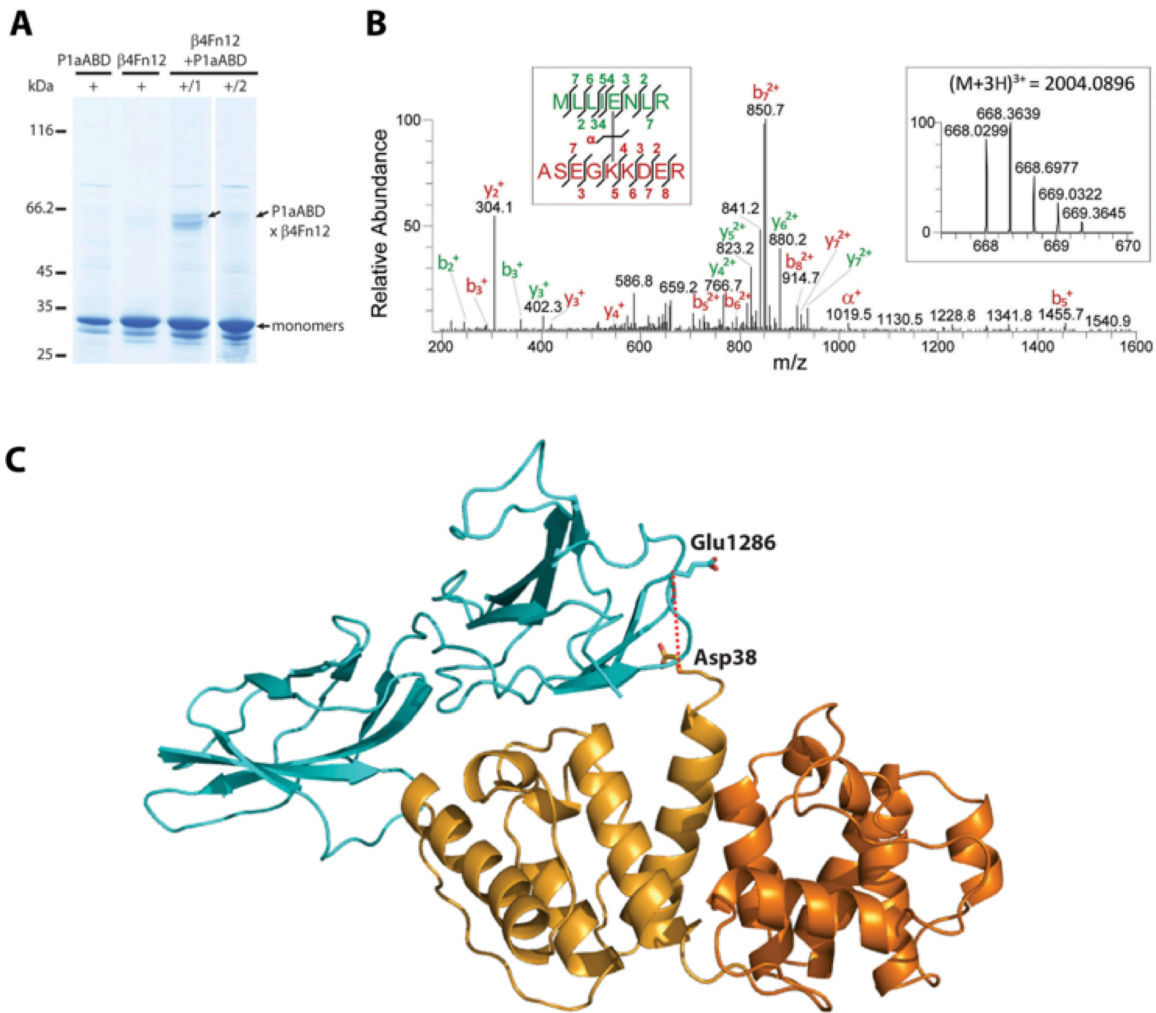

260

261 **Supplementary Figure 8. (Supporting Results section “N-terminal Tail of Plectin 1a is not**  
 262 **Involved in Interaction with Integrin β4” and Figure 6)**

263 **(A)** SDS-PAGE analysis of β4Fn12/P1aABD complex cross-linked by zero-length chemical cross-  
 264 linker EDC and sulfo-NHS. Proteins were incubated separately with cross-linker (+), in a one-  
 265 step (+/1) or in a two-step (+/2) reaction activating β4Fn12. **(B)** MS/MS-Spectrum identifying a  
 266 pair of cross-linked peptides after in-gel proteolysis of the P1aABD/β4Fn12 complex. **(C)** Crystal  
 267 structure of the P1aABD/β4Fn12 shows that the cross-linking and MS results are consistent  
 268 with the crystal structure. A distance between two Cα atoms (integrin β4 Glu1286 and plectin  
 269 Asp38) is 12.97 Å.

270

**A**

|        |     |           |           |           |         |      |     |
|--------|-----|-----------|-----------|-----------|---------|------|-----|
| N-lobe | 9   | IAEFKEAFS | LFDKDGDGT | ITTKELGTV | MRS     | LGQ  | 41  |
| C-lobe | 82  | EEEIREAFR | VFDKDGNGY | ISAAELRHV | MTNLGE  |      | 114 |
|        | 42  | NPTEAELQD | MINEV     | DADGNGT   | IDFPEFL | TMM  | 73  |
|        | 115 | KLTDDEEV  | DEMIRE    | ADIDGDGQ  | VNYEEF  | VQMM | 146 |

**B**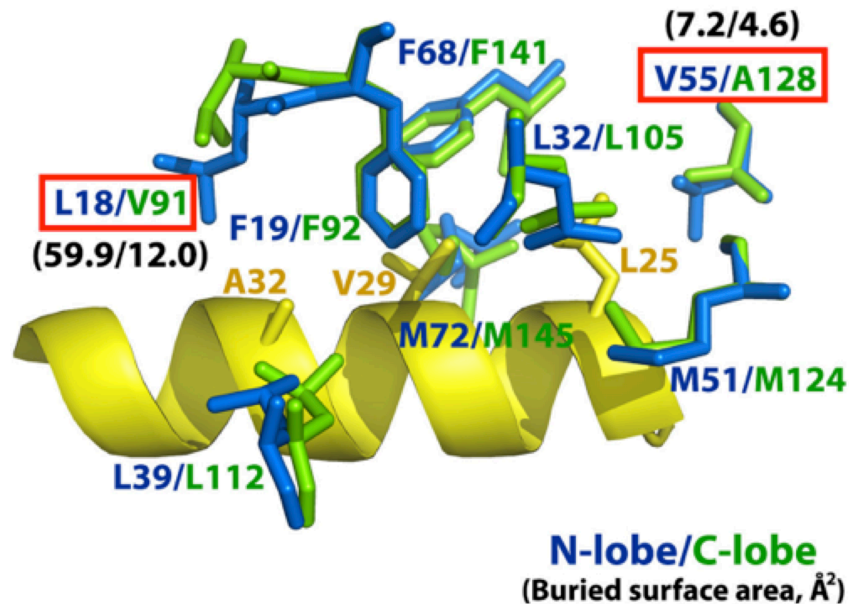

271

272 **Supplementary Figure 9. (Supporting Results section “Molecular Determinants of Integrin  $\beta 4$** 273 **Displacement from the Complex with Plectin 1a by Calmodulin”)**274 **(A)** The sequence alignment of each lobe of CaM. The interfacing residues were analyzed by275 PDBePISA and shaded in yellow. Different residues between two lobes are shown in red **(B)**

276 Interfacing hydrophobic residues of two lobes determined by Ligplot are superimposed and

277 shown in sticks; N-lobe in blue and C-lobe in green, showing that Leu18 ( $59.9 \text{ \AA}^2$ ) and Val55 ( $7.2$ 278  $\text{ \AA}^2$ ) in N-lobe offer a larger surface areas than Val91 ( $12.0 \text{ \AA}^2$ ) and Ala128 ( $4.6 \text{ \AA}^2$ ) in C-lobe.

279 Hydrophobic residues of P1a corresponding to a 1-5-8 motif (Leu25-Val29-Ala32) are displayed

280 in yellow.

281 **References**

- 282 Babu, Y.S., Bugg, C.E., and Cook, W.J. (1988). Structure of calmodulin refined at 2.2 Å resolution.  
283 *J Mol Biol* 204, 191-204.
- 284 Bernado, P., Mylonas, E., Petoukhov, M.V., Blackledge, M., and Svergun, D.I. (2007). Structural  
285 characterization of flexible proteins using small-angle X-ray scattering. *J Am Chem Soc* 129,  
286 5656-5664.
- 287 Blanchet, C.E., Zozulya, A.V., Kikhney, A.G., Franke, D., Konarev, P.V., Shang, W.F., Klaering, R.,  
288 Robrahn, B., Hermes, C., Cipriani, F., *et al.* (2012). Instrumental setup for high-throughput small-  
289 and wide-angle solution scattering at the X33 beamline of EMBL Hamburg. *J Appl Crystallogr* 45,  
290 489-495.
- 291 Cox, J., Neuhauser, N., Michalski, A., Scheltema, R.A., Olsen, J.V., and Mann, M. (2011).  
292 Andromeda: a peptide search engine integrated into the MaxQuant environment. *J Proteome*  
293 *Res* 10, 1794-1805.
- 294 Cristodero, M., Mani, J., Oeljeklaus, S., Aeberhard, L., Hashimi, H., Ramrath, D.J., Lukes, J.,  
295 Warscheid, B., and Schneider, A. (2013). Mitochondrial translation factors of *Trypanosoma*  
296 *brucei*: Elongation factor-Tu has a unique subdomain that is essential for its function. *Mol*  
297 *Microbiol.*
- 298 David, G., and Perez, J. (2009). Combined sampler robot and high-performance liquid  
299 chromatography: a fully automated system for biological small-angle X-ray scattering  
300 experiments at the Synchrotron SOLEIL SWING beamline. *J Appl Crystallogr* 42, 892-900.
- 301 Franke, D., and Svergun, D.I. (2009). DAMMIF, a program for rapid ab-initio shape  
302 determination in small-angle scattering. *J Appl Crystallogr* 42, 342-346.
- 303 Geer, L.Y., Markey, S.P., Kowalak, J.A., Wagner, L., Xu, M., Maynard, D.M., Yang, X., Shi, W., and  
304 Bryant, S.H. (2004). Open mass spectrometry search algorithm. *J Proteome Res* 3, 958-964.
- 305 Konarev, P.V., Volkov, V.V., Sokolova, A.V., Koch, M.H.J., and Svergun, D.I. (2003). PRIMUS: a  
306 Windows PC-based system for small-angle scattering data analysis. *J Appl Crystallogr* 36, 1277-  
307 1282.
- 308 Kostan, J., Gregor, M., Walko, G., and Wiche, G. (2009). Plectin isoform-dependent regulation of  
309 keratin-integrin alpha6beta4 anchorage via Ca<sup>2+</sup>/calmodulin. *The Journal of biological*  
310 *chemistry* 284, 18525-18536.
- 311 Krissinel, E., and Henrick, K. (2007). Inference of macromolecular assemblies from crystalline  
312 state. *J Mol Biol* 372, 774-797.

313 Niessen, C.M., Hulsman, E.H., Oomen, L.C., Kuikman, I., and Sonnenberg, A. (1997). A minimal  
314 region on the integrin beta4 subunit that is critical to its localization in hemidesmosomes  
315 regulates the distribution of HD1/plectin in COS-7 cells. *J Cell Sci* 110 ( Pt 15), 1705-1716.

316 Petoukhov, M.V., Franke, D., Shkumatov, A.V., Tria, G., Kikhney, A.G., Gajda, M., Gorba, C.,  
317 Mertens, H.D.T., Konarev, P.V., and Svergun, D.I. (2012). New developments in the ATSAS  
318 program package for small-angle scattering data analysis. *J Appl Crystallogr* 45, 342-350.

319 Rezniczek, G.A., de Pereda, J.M., Reipert, S., and Wiche, G. (1998). Linking integrin alpha6beta4-  
320 based cell adhesion to the intermediate filament cytoskeleton: direct interaction between the  
321 beta4 subunit and plectin at multiple molecular sites. *J Cell Biol* 141, 209-225.

322 Schlosser, A., Vanselow, J.T., and Kramer, A. (2007). Comprehensive phosphorylation site  
323 analysis of individual phosphoproteins applying scoring schemes for MS/MS data. *Anal Chem*  
324 79, 7439-7449.

325 Stanek, D., and Neugebauer, K.M. (2004). Detection of snRNP assembly intermediates in Cajal  
326 bodies by fluorescence resonance energy transfer. *J Cell Biol* 166, 1015-1025.

327 Svergun, D. (1992). Determination of the regularization parameter in indirect-transform  
328 methods using perceptual criteria. *J Appl Crystallogr* 25, 495-503.

329 Volkov, V.V., and Svergun, D.I. (2003). Uniqueness of ab initio shape determination in small-  
330 angle scattering. *J Appl Crystallogr* 36, 860-864.

331

332
